# Supplementary material
Source: PubMed Central journal article supplement (PMC4937520)
Supplement: 10.1074_M115.055558_mcp.M115.055558-5.pdf [file 10.1074_M115.055558_mcp.M115.055558-5.pdf]

## Supplemental Figure S5

The matching quality of different add-on libraries with the seed library. A), the retention time correlation between the seed library, Lib2, and the add-on libraries, Lib3, Lib4, Lib5, Lib6 and Lib7. B), the relative ion intensity correlation (Spearman) between the seed library, Lib2, and the add-on libraries, Lib3, Lib4, Lib5, Lib6 and Lib7. C), the median of Spearman correlation of relative ion intensity between the seed library, Lib2, and the add-on libraries, Lib3, Lib4, Lib5, Lib6 and Lib7.

A

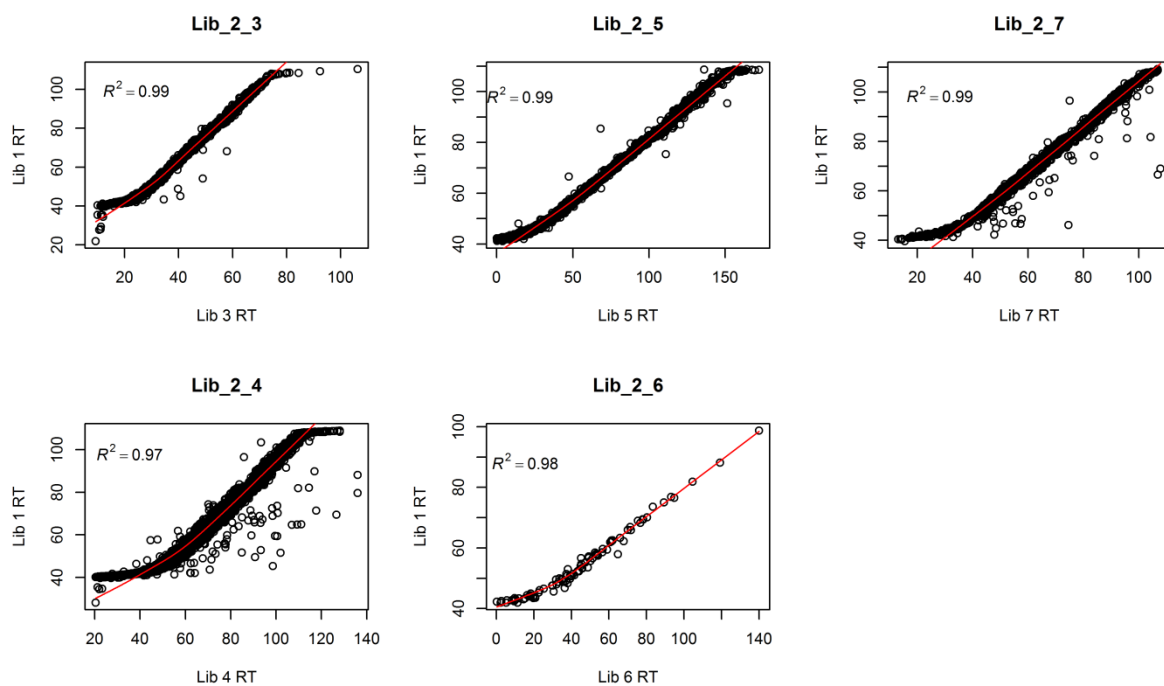

**B** Relative ion intensity correlations (spearman)

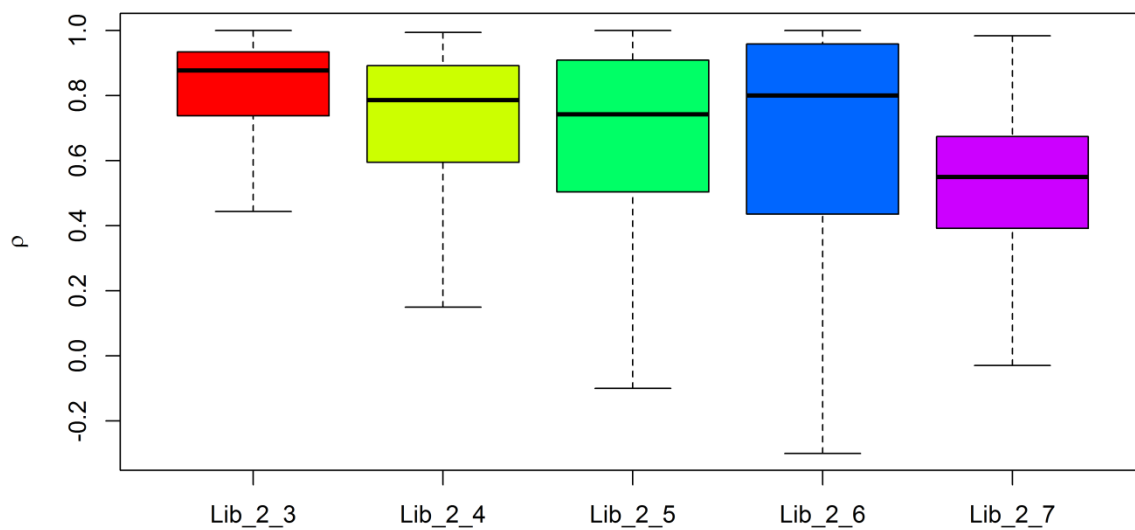

**C**

|                        | Lib_2_3 | Lib_2_4 | Lib_2_5 | Lib_2_6 | Lib_2_7 |
|------------------------|---------|---------|---------|---------|---------|
| Median Spearman $\rho$ | 0.88    | 0.79    | 0.74    | 0.8     | 0.55    |
