# Supplementary material
Source: PubMed Central journal article supplement (PMC4937520)

## Supplemental Table

Chromatographic setup for two Sciex 5600 TripleTOF instruments

| Instrument              | # Injection | Sample type                              | nanoLC system          | Peptide trap           | Column                                                             | Gradient (Buffer A: 99.9% water + 0.1% Formic acid; Buffer B: 99.9% acetonitrile + 0.1% Formic acid) |
|-------------------------|-------------|------------------------------------------|------------------------|------------------------|--------------------------------------------------------------------|------------------------------------------------------------------------------------------------------|
| Sciex 5600 Triple TOF 1 | 2           | mixture of 5% yeast in human IDA         | nanoLC-as-2 (Eksigent) | Bruker Peptide captrap | 75 $\mu$ m x 10cm of solid core Halo C18, 160 Å, 2.7 $\mu$ m media | Buffer B: 2% to 30% in 100 min                                                                       |
| Sciex 5600 Triple TOF 2 | 2           | Pure yeast and pure human IDA separately | nanoLC-as-2 (Eksigent) | Bruker Peptide captrap | 75 $\mu$ m x 10cm of solid core Halo C18, 160 Å, 2.7 $\mu$ m media | Buffer B: 5% to 50% in 100 min                                                                       |

**Supplemental Figure** Two TIC data acquired using two different 5600 instruments (5600\_1 and 5600\_2)

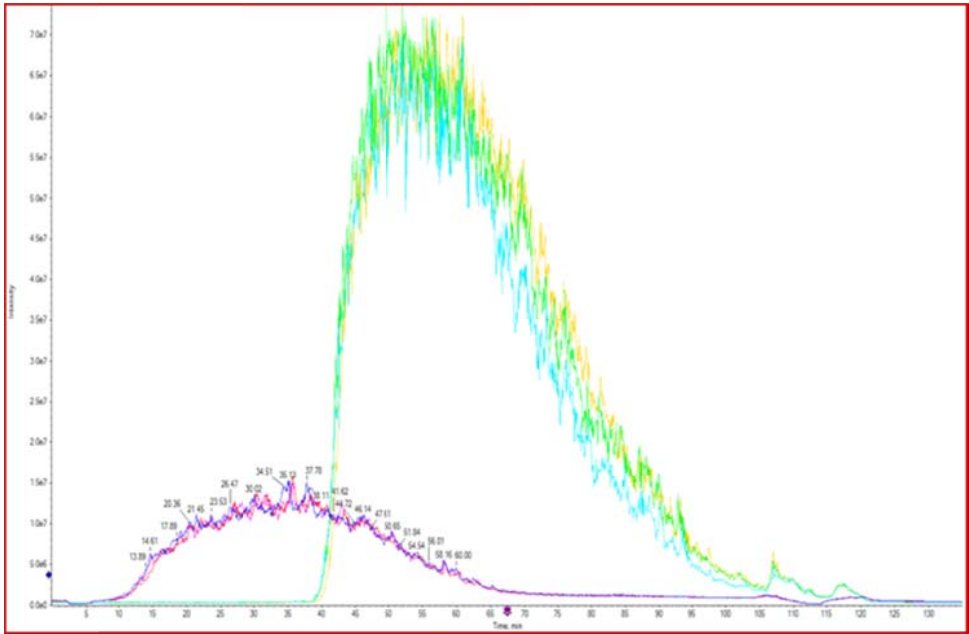

Supplement: 10.1074_M115.055558_mcp.M115.055558-7.pdf [file 10.1074_M115.055558_mcp.M115.055558-7.pdf]
