# Supplementary material
Source: PubMed Central journal article supplement (PMC4937520)
Supplement: 10.1074_M115.055558_mcp.M115.055558-10.pdf [file 10.1074_M115.055558_mcp.M115.055558-10.pdf]

## ***Supplemental R package information***

This documentation describes the information contained in the SwathXtend R package which is included as SwathXtend.zip in the Supplemental Data.

The package contains all the spectral peptide ion libraries involved in this study. The library names and their location are as follows.

| <b>Library</b> | <b>File location</b>          |
|----------------|-------------------------------|
| Lib1           | SwathXtend\files\Lib1.txt     |
| Lib2           | SwathXtend\files\Lib2.txt     |
| Lib3           | SwathXtend\files\Lib3.txt     |
| Lib4           | SwathXtend\files\Lib4.txt     |
| Lib5           | SwathXtend\files\Lib5.txt     |
| Lib6           | SwathXtend\files\Lib6.txt     |
| Lib7           | SwathXtend\files\Lib7.txt     |
| Lib2_3         | SwathXtend\files\Lib2_3.txt   |
| Lib2_4         | SwathXtend\files\Lib2_4.txt   |
| Lib2_5_6       | SwathXtend\files\Lib2_5_6.txt |
| Lib2_7         | SwathXtend\files\Lib2_7.txt   |
| Lib5_6         | SwathXtend\files\Lib5_6.txt   |

The package also contains all the extracted SWATH results using the above libraries. The results file information is as follows.

| <b>Library used</b> | <b>Extraction result file</b>       |
|---------------------|-------------------------------------|
| Lib1                | SwathXtend\files\5600_Lib1.xlsx     |
| Lib2                | SwathXtend\files\5600_Lib2.xlsx     |
| Lib2_3              | SwathXtend\files\5600_Lib2_3.xlsx   |
| Lib2_4              | SwathXtend\files\5600_Lib2_4.xlsx   |
| Lib2_5_6            | SwathXtend\files\5600_Lib2_5_6.xlsx |
| Lib2_7              | SwathXtend\files\5600_Lib2_7.xlsx   |
| Lib5_6              | SwathXtend\files\5600_Lib5_6.xlsx   |

The SwathXtend package can be installed from R using the following scripts.

```
# First install the following packages

install.packages(c("e1071", "VennDiagram", "openxlsx"))

# Next install SwathXtend from the R GUI, using the zip file downloaded.
```

A few examples of how to use SwathXtend are below.

```
# Load the SwathXtend
library(SwathXtend)

# Estimated running times on a MS Window machine of Intel Core i5-2500 CUP @ 3.30GHz

# Generating extended library Lib2_3, running time 1 minute and 35 seconds
libfiles <- paste(system.file("files",package="SwathXtend"), c("Lib2.txt","Lib3.txt"),sep="/")
Lib2_3 <- buildSpectraLibPair(libfiles[1], libfiles[2], outputFile = "Lib2_3.txt",
  outputFormat="PeakView", clean=T, nomod=T, nomc=T, plot=F)

# Generating extended library Lib2_5_6, running time 7 minutes and 48 seconds
libfiles <- paste(system.file("files",package="SwathXtend"), c("Lib2.txt","Lib5.csv",
  "Lib6.csv"),sep="/")
Lib2_5_6 <- buildSpectraLibTriple(libfiles[1], libfiles[2],libfiles[3],
  labelAddon1="HUMAN", labelAddon2 = "YEAST", outputFile = "Lib2_5_6.txt",
  outputFormat="PeakView", clean=T, nomod=T, nomc=T, plot=F)

# Generating most of the tables/images from the main text and supplemental, running time approx..
8 minutes
source( paste(system.file("files", package="SwathXtend"), "/paper code stats part final.R", sep="" ) )
```
