# Supplementary material
Source: PubMed Central journal article supplement (PMC4937520)
Supplement: 10.1074_M115.055558_mcp.M115.055558-11.pdf [file 10.1074_M115.055558_mcp.M115.055558-11.pdf]

**Table 2** Appended rows for Storey q-value correction in addition to BH and Bonferroni – the results are similar to the BH-correction.

|               | Lib1           | Lib2         | Lib2_3         | Lib2_4         | Lib2_5_6       |  |
|---------------|----------------|--------------|----------------|----------------|----------------|--|
| AnovaFC       | 167 13( 7.2%)  | 11 6(35.3%)  | 160 13( 7.5%)  | 125 32(20.4%)  | 130 71(35.3%)  |  |
| AnovaBf       | 29 1( 3.3%)    | 5 0( 0.0%)   | 22 0( 0.0%)    | 11 1( 8.3%)    | 9 0( 0.0%)     |  |
| AnovaFdr      | 123 21(14.6%)  | 11 0( 0.0%)  | 98 11(10.1%)   | 63 6( 8.7%)    | 73 7( 8.8%)    |  |
| Anova         | 173 133(43.5%) | 11 76(87.4%) | 162 142(46.7%) | 128 160(55.6%) | 141 258(64.7%) |  |
| FC            | 324 94(22.5%)  | 12 86(87.8%) | 277 119(30.1%) | 279 375(57.3%) | 251 806(76.3%) |  |
| AnovaFdrFC    | 121 5( 4.0%)   | 11 0( 0.0%)  | 98 3( 3.0%)    | 62 2( 3.1%)    | 72 3( 4.0%)    |  |
|               |                |              |                |                |                |  |
| AnovaQValue   | 127 29(18.6%)  | 11 3(21.4%)  | 126 34(21.2%)  | 64 6( 8.6%)    | 77 8( 9.4%)    |  |
| AnovaQvalueFC | 125 5( 3.8%)   | 11 1( 8.3%)  | 125 6( 4.6%)   | 63 2( 3.1%)    | 75 3( 3.8%)    |  |
